# Supplementary material for: Galectin-3 mediates lysosome-related inflammation within monocyte-derived macrophages in a mouse model of ischemic brain injury
Source: JCI journal article supplement (doi:10.1172/jci194139), 2026-02-17
Supplement: sd2 [file 2]

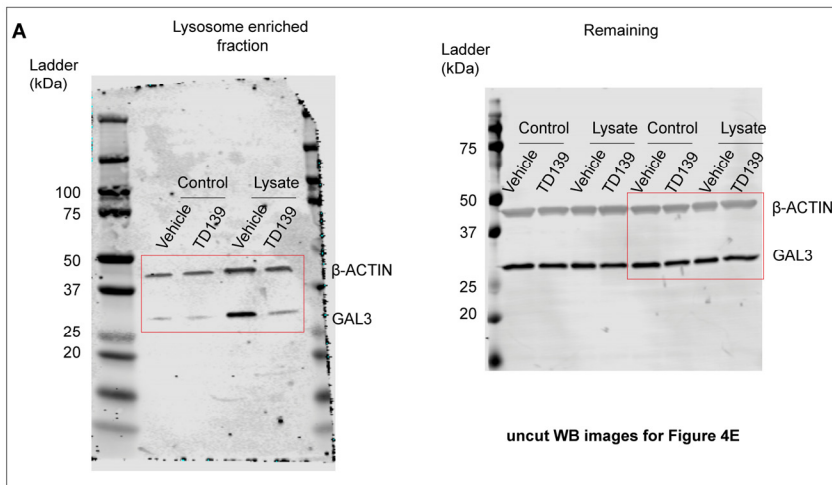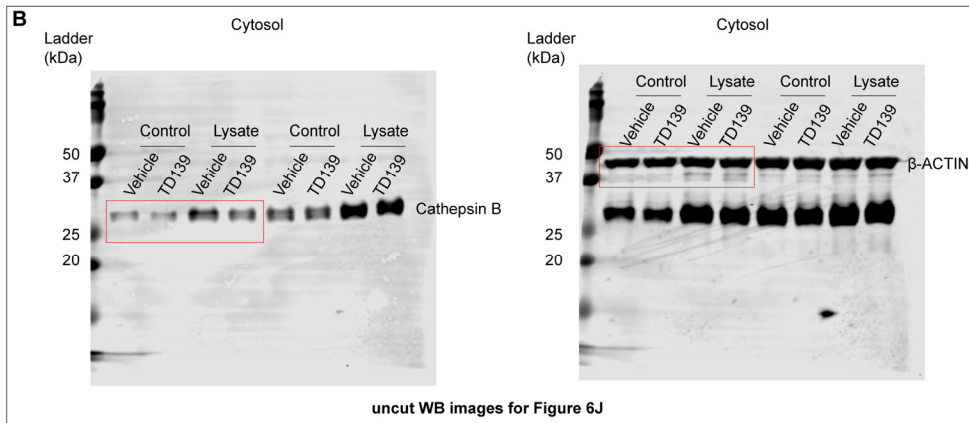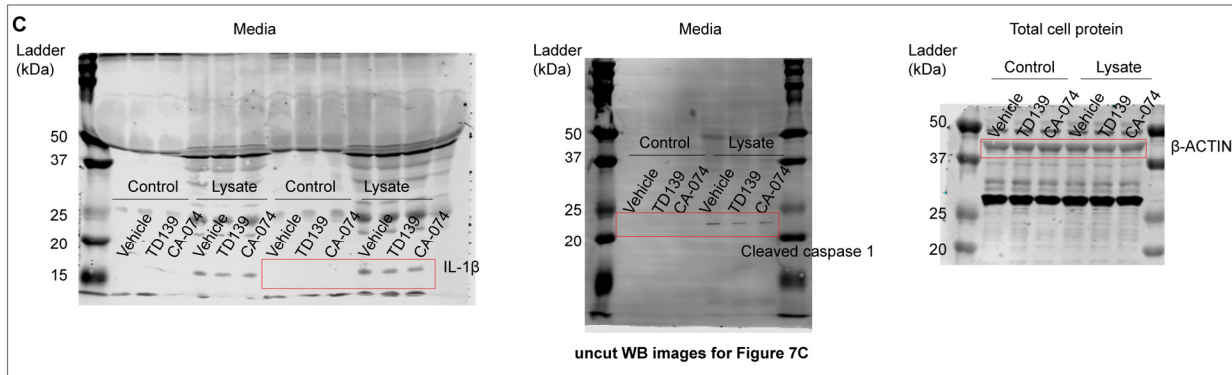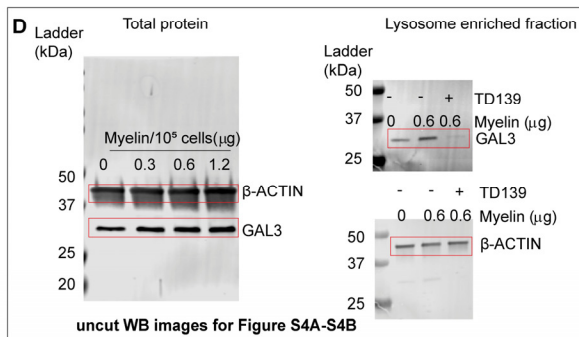

**Whole gel scanning for western blotting analyses. (A)** Full-length blot scan for western blotting analyses of GAL3 and  $\beta$ -ACTIN in lysosome enriched fraction and remaining fraction from control or brain lysate-treated BMDMs in Figure 4E. **(B)** Full-length blot scan for western blotting analyses of cathepsin B and  $\beta$ -ACTIN in cytosolic fraction from control or brain lysate-treated BMDMs in Figure

6J. **(C)** Full-length blot scan for western blotting analyses of IL-1 $\beta$  and cleaved caspase 1 in conditioned media, and  $\beta$ -ACTIN in the corresponding cells from control or brain lysate-treated BMDM culture in Figure 7C. **(D)** Full-length blot scan for western blotting analyses of GAL3 and  $\beta$ -ACTIN in total cell lysates or lysosome enriched fraction from control or myelin-treated BMDMs in Figure S4A-B. (related to Figure 4, 6, 7, and S4)
